# Supplementary material for: Hospital admission and mortality rates for non-covid diseases in Denmark during covid-19 pandemic: nationwide population based cohort study
Source: PubMed Central journal article supplement — BMJ. 2021 May 25;373:n1135. doi: 10.1136/bmj.n1135 (PMC8142604; doi:10.1136/bmj.n1135), 2021-05-25

## Supplementary Material

**Supplementary Table 1: Diagnosis codes used in the Danish National Patient Registry to categorise all study participants according to ICD-10 major diagnosis group and essential medical condition.**

| Diagnosis codes*                                  | ICD-10                                                                 |
|---------------------------------------------------|------------------------------------------------------------------------|
| <b>Major diagnosis groups</b>                     |                                                                        |
| Infectious diseases                               | A, B (excluding B342A and B972A), G00-G08                              |
| Cancer                                            | C                                                                      |
| Haematological disorders                          | D                                                                      |
| Endocrine, nutrition and metabolism               | E                                                                      |
| Mental and behavioural disorders                  | F                                                                      |
| Diseases of the nervous system                    | G (excluding G00-G08)                                                  |
| Sensory organ disease                             | H                                                                      |
| Circulatory disease                               | I                                                                      |
| Respiratory diseases                              | J                                                                      |
| Digestive diseases                                | K                                                                      |
| Dermatological diseases                           | L                                                                      |
| Bone, muscle, and connective tissues              | M                                                                      |
| Genito-urinary system                             | N                                                                      |
| Symptoms, signs, and abnormal laboratory findings | R                                                                      |
| Injury or poisoning                               | S, T                                                                   |
| <b>Selected medical conditions</b>                |                                                                        |
| Myocardial infarction                             | I21, I23                                                               |
| Heart failure                                     | I50                                                                    |
| Stroke                                            | I63, I64                                                               |
| Intracranial bleeding                             | I60-I62                                                                |
| Cancer                                            | C (excl. C44)                                                          |
| Acute exacerbations of chronic pulmonary disease  | J40-J47, J961, J982                                                    |
| Pneumonia                                         | J13-J18                                                                |
| Sepsis                                            | A021, A2067, A40, A41, A282B, A327, A392, A394, A427, A499, B377, R572 |
| Urinary tract infection                           | N10-N12, N30, N151, N390                                               |
| Bone, skin, and soft tissue infections            | A46, L01, L03, L08, M00, M011, M013, M726, M86                         |
| <b>Covid-19</b>                                   | <b>B342A, B972A</b>                                                    |

ICD: World Health Organization's International Classification of Diseases. Covid-19: Coronavirus disease 2019. \*Patients diagnosed with Covid-19 within five days of admission were categorized as Covid-19.

## Supplementary Figure 1: Study design, variables, and timeline

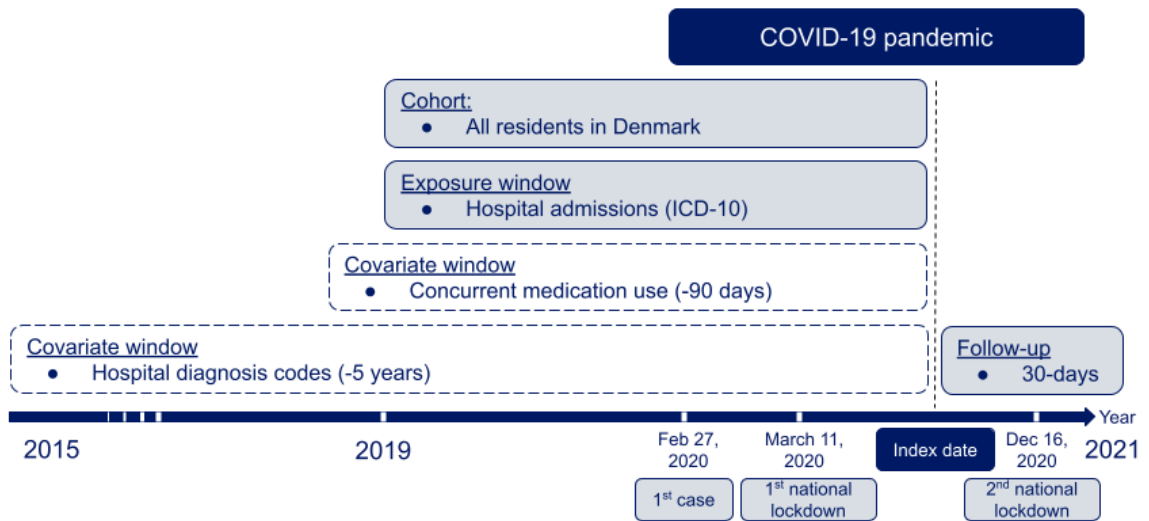

Index date: Date of index hospitalization. Concurrent medication: Reimbursement of dispensed prescription medicine at any pharmacy in Denmark within 90 days of hospitalisation.

**Supplementary Figure 2: Flowchart of hospitalisations during the study period.**

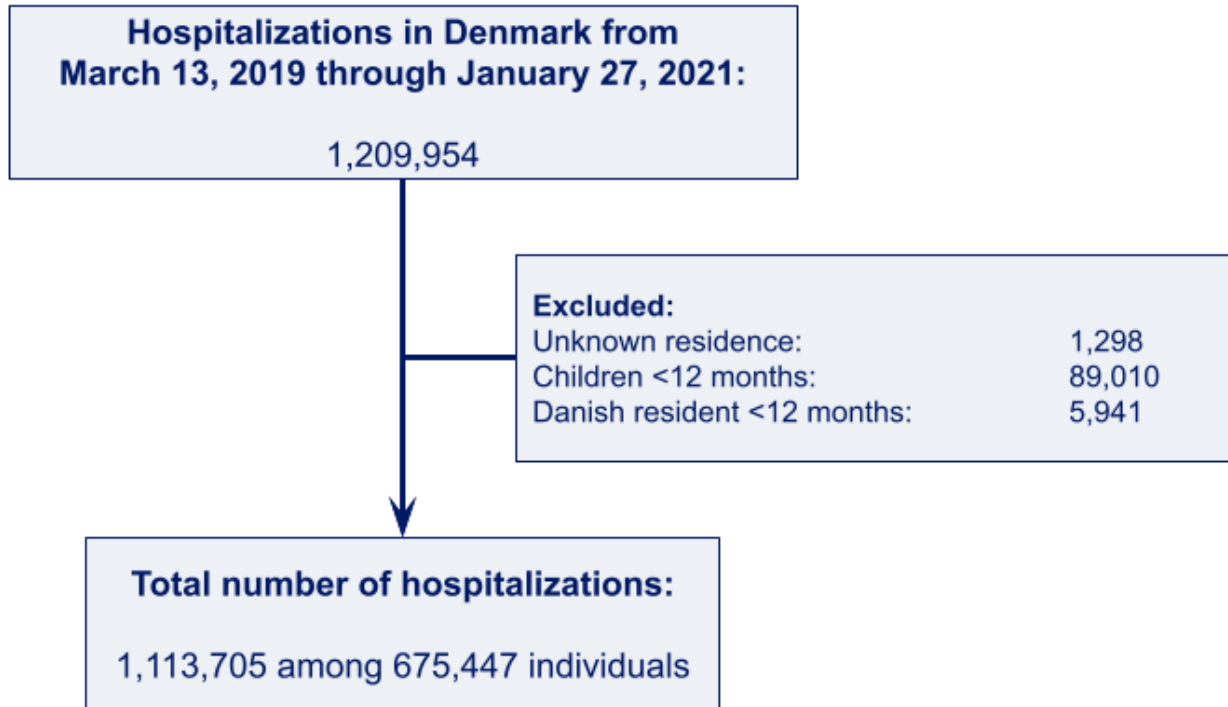

Supplement: bodj064535.ww.pdf [file bodj064535.ww.pdf]
